# Supplementary material for: Rapid staining method to detect and identify downy mildew (Peronospora belbahrii) in basil
Source: PubMed Central journal article supplement — Appl Plant Sci. 2013 Jul 5;1(7):apps.1300032. doi: 10.3732/apps.1300032 (PMC4103132; doi:10.3732/apps.1300032), 2013-07-05
Supplement: apps.1300032_s1.pdf [file apps.1300032_s1.pdf]

APPENDIX 1. Protocol for staining method for rapid identification of downy mildew in basil.

1. Using a scalpel, section samples into approximately 1-cm<sup>2</sup> sections;
2. Place sectioned specimen on microscope slide with abaxial side facing up;
3. Add two drops of Visikol (obtained from Phytosys LLC, New Brunswick, New Jersey, USA) to the sample so that it is totally submerged;
4. Add a cover slip (0.17-mm thickness, No. 1);
5. Heat on hot plate for 30–60 s until just before boiling, when air bubbles move to the edge of the slide;
6. After cooling, remove cover slip and add two drops of I<sub>2</sub>/KI solution (0.5 g I<sub>2</sub>, 1.5 g KI in 25 mL H<sub>2</sub>O);
7. After 1 min, add one drop of 70% H<sub>2</sub>SO<sub>4</sub>;
8. Replace the cover slip, wait 5 min, and visualize.
